# Supplementary material
Source: publisher figshare collection journal article supplement (https://gsajournals.figshare.com/ndownloader/files/38008899)
Supplement: Supplementary file 1 [file 38008899]

Table S2. Summary of PacBio sequencing data

|  | PacBio |
| --- | --- |
| Number of Bases | 25,862,352,946 |
| Number of Reads | 3,789,829 |
| N50 Read Length (bp) | 12,250 |
| Mean Read Length (bp) | 6,824 |
| GC % | 38% |
| Nominal coverage (337 Mb genome) | 77x |
